# Supplementary material for: BKCa promotes growth and metastasis of prostate cancer through facilitating the coupling between αvβ3 integrin and FAK
Source: PubMed Central journal article supplement (PMC5130001; doi:10.18632/oncotarget.9559), 2016-05-23
Supplement: oncotarget-07-40174-s001.pdf [file oncotarget-07-40174-s001.pdf]

## BKCa promotes growth and metastasis of prostate cancer through facilitating the coupling between $\alpha v\beta 3$ integrin and FAK

### SUPPLEMENTARY FIGURES

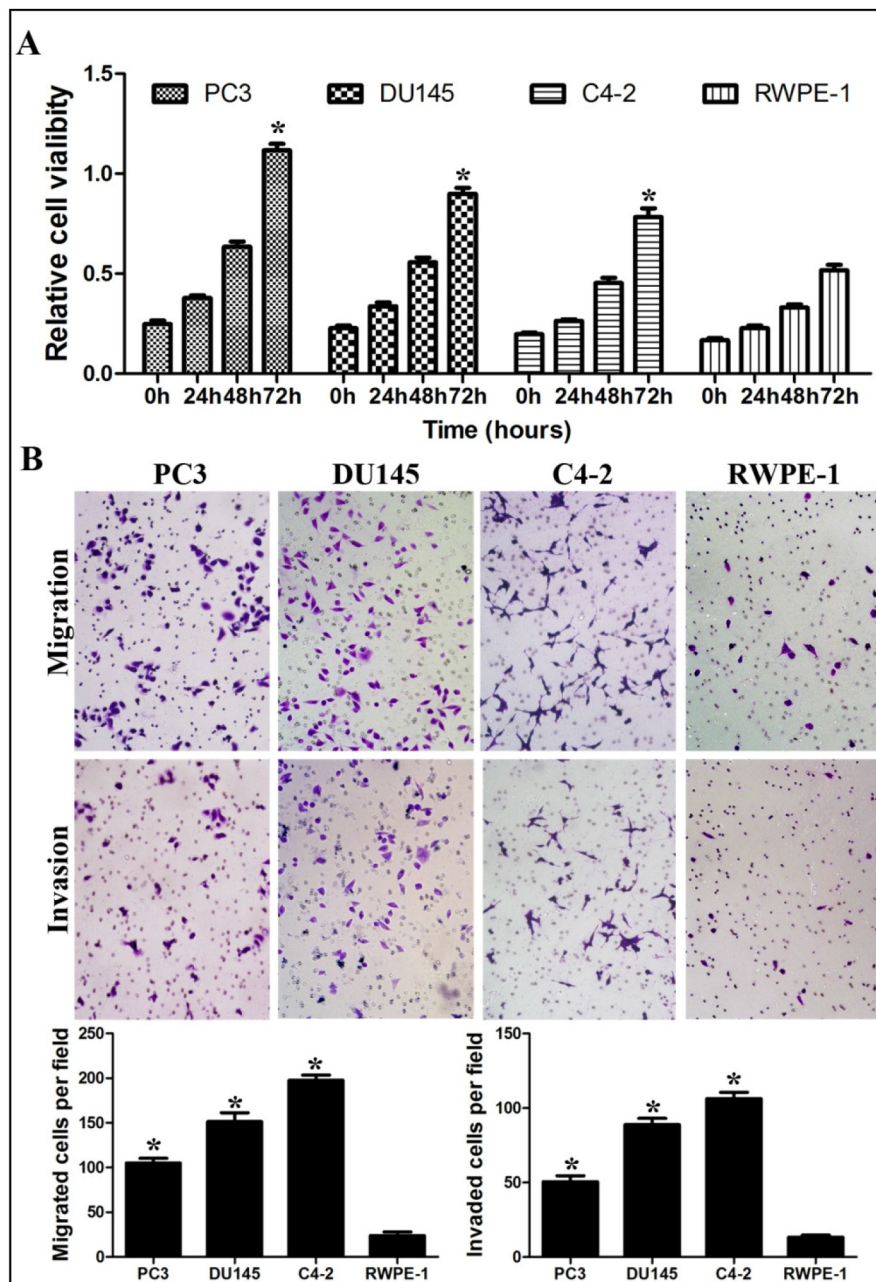

**Supplementary Figure S1: Proliferation, migration and invasion ability of prostate cell lines.** **A.** Cell proliferation was determined by MTT assay in cancerous prostate PC3, DU145, C4-2 cells and normal prostate RWPE-1 cells. **B.** Cell migration and invasion ability were determined by transwell assays in the indicated cell lines. Representative images and mean numbers of migrated and invaded cells were shown. All the experiments were performed in triplicate. The data are shown as the means  $\pm$  se. \*  $p < 0.05$  compared with RWPE-1.

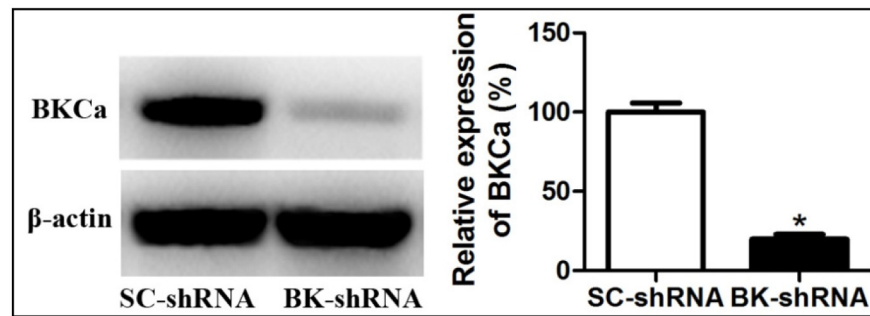

**Supplementary Figure S2: Downregulation of BkCa in PC3 xenografts.** Western blot analysis of BkCa expression in SC-shRNA and BK-shRNA infected PC3 cell xenografts. The experiments were performed in triplicate. The data are shown as the means  $\pm$  se. \* $P < 0.05$ .

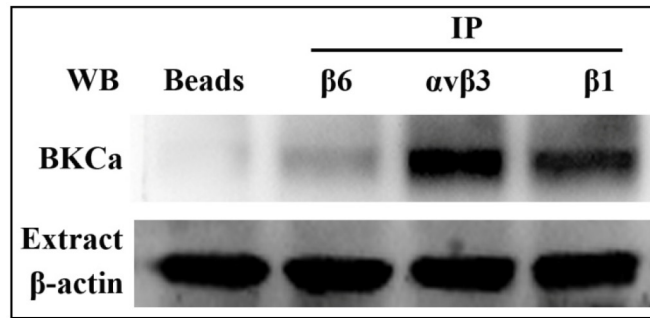

**Supplementary Figure S3: Co-immunoprecipitation of integrin subunits and BKC $\alpha$  in PC3 cells.** Proteins were extracted, immunoprecipitated and revealed using antibodies against  $\beta 6$ ,  $\alpha v \beta 3$  and  $\beta 1$  integrin. Bead lanes contain the protein G conjugated sepharose beads used during the immunoprecipitation without the protein input. Equal amount of protein extract from each group was loaded in Western blot with  $\beta$ -actin as the loading control.

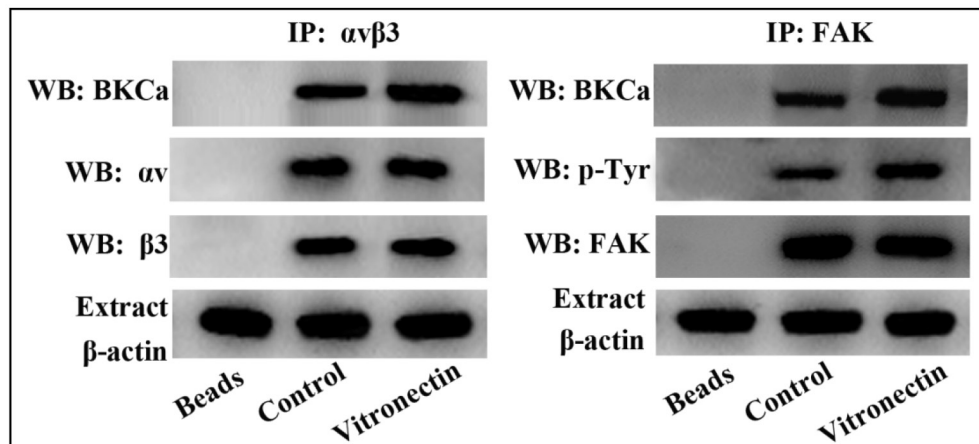

**Supplementary Figure S4: Vitronectin stimulated BKCa/ $\alpha$ v $\beta$ 3 integrin interaction and FAK phosphorylation in PC3 cells.** The immunocomplex was pulled down using  $\alpha$ v $\beta$ 3 integrin or FAK antibody. Cells stimulated by vitronectin (seeded on vitronectin-coated dishes for 60 min) showed increased BKCa/ $\alpha$ v $\beta$ 3 integrin complex (left panel) and BKCa/FAK complex formation (right panel) and FAK phosphorylation. The expression of  $\alpha$ v $\beta$ 3 integrin and FAK proteins was unchanged. Bead lanes contain the protein G conjugated sepharose beads used during the immunoprecipitation without the protein input. Equal amount of protein extract from each group was loaded in Western blot with  $\beta$ -actin as the loading control.

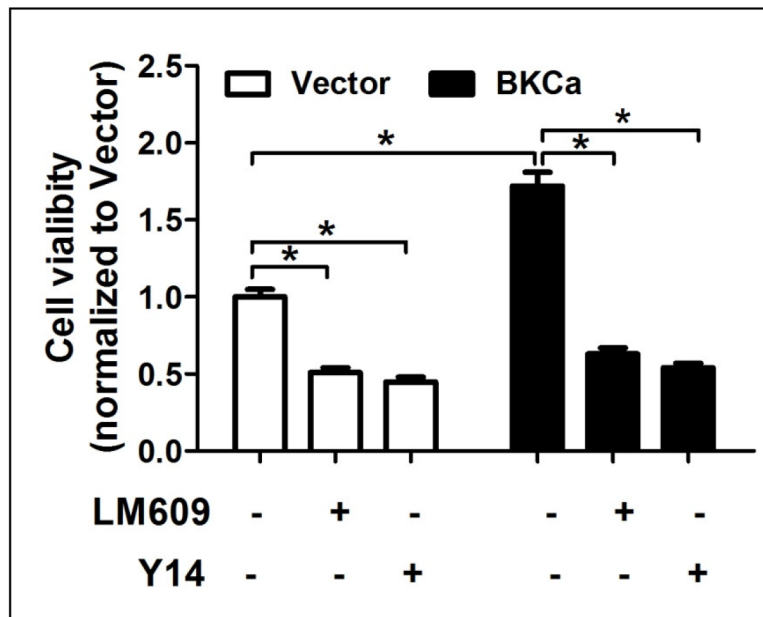

**Supplementary Figure S5: Effects of BKCα channel modulators on the proliferation of PC3 cells upon BKCα upregulation or downregulation.** Cell viability was determined by CCK-8 assay in PC3 cells with or without overexpression (or downregulation) of BKCα in the presence of 30μM NS1619 or 100nM IBTX for 48 hr. The experiments were performed in triplicate. The data are shown as the means ± se. \*P < 0.05.
